# Supplementary material
Source: publisher site journal article supplement (https://www.dovepress.com/get_supplementary_file.php?f=supplementary_file_74449.pdf)
Supplement: Supplementary file 1 [file get_supplementary_file.php]

## Supplementary Material

Table S1a Studies Including Infants  $\leq 28$  Completed Weeks Gestation

| Author/Year/Country          | Journal                           | Gestation Age Range (weeks) | Primary Endpoint/Outcome                                                                                                                               | Strengths/Weaknesses                                                                                                                                                                                                                              | Findings pertaining to Head Size                                                                                                                                                                                                                                                                                                                                                                                     | Head Size Reference                                                | Neurodevelopmental Assessments                                   |
|------------------------------|-----------------------------------|-----------------------------|--------------------------------------------------------------------------------------------------------------------------------------------------------|---------------------------------------------------------------------------------------------------------------------------------------------------------------------------------------------------------------------------------------------------|----------------------------------------------------------------------------------------------------------------------------------------------------------------------------------------------------------------------------------------------------------------------------------------------------------------------------------------------------------------------------------------------------------------------|--------------------------------------------------------------------|------------------------------------------------------------------|
| Bracewell MA et al, 2007, UK | Arch Dis Child Fetal Neonatal Ed. | $\leq 25^{+b}$              | To study growth and blood pressure in extremely preterm children at 6 years                                                                            | <p><b>Strengths:</b> Multicentre; large sample size of extremely premature infants; controlled for ethnicity</p> <p><b>Weaknesses:</b> Head size not correlated with neurodevelopmental follow-up</p>                                             | <ul style="list-style-type: none"> <li>At 30 months OFC catch-up was significantly worse for those born at <math>&lt; 23</math> weeks</li> <li>Mean OFC at 6 years rose by 0.21 SD for each gestational week</li> <li>Birth weight for gestational age had a significant independent additional effect on head size.</li> </ul>                                                                                      | The Child Growth Foundation British 1990 reference                 |                                                                  |
| Kuban, 2009, USA             | Journal of Pediatrics             | $< 28$                      | To compare infants born with microcephaly and those with normal head size at birth at 2 years.                                                         | <p><b>Strengths</b> – Multicentre, large sample size</p> <p><b>Weaknesses</b> – Loss to follow up - 20% of enrolled infants who survived to 24 months lost to follow up. No comment on infants who survived to discharge but not to 24 months</p> | <ul style="list-style-type: none"> <li>Congenital microcephaly alone is not a risk factor, unless persistent</li> <li>71% with congenital microcephaly not microcephalic at 24 months</li> <li>Microcephaly associated with growth restriction associated with poorer outcomes</li> </ul>                                                                                                                            | <p>Oxford UK data set ( Birth)</p> <p>CDC data set (24 months)</p> | Neurological examination @ 24 months<br>BSITD3<br>MCHAT<br>GMFCS |
| Kan E et al, 2008, Australia | Early Hum Dev.                    | 23-27 <sup>+b</sup>         | To determine associations between weight and head circumference, at birth and postnatally, with cognitive, academic and motor outcomes at age 8 years. | <p><b>Strengths:</b> Multicentre; Blinded assessors; Use of a control group; 93% follow up ;Detailed assessment @ 8years</p> <p><b>Weaknesses:</b> Data from early 1990's; Missing data for head circumference at birth</p>                       | <ul style="list-style-type: none"> <li>Preterm cohort had significantly smaller head size than the reference standard at all ages</li> <li>OFC strongly related to cognitive, academic and motor outcomes at 2 and 8 years, not at birth</li> <li>OFC catch-up between birth and 2 years associated with a favourable neurodevelopmental profile at age 8, however catch-up thereafter had minimal impact</li> </ul> | British Growth Reference                                           | Paediatric assessment @ 8years<br>WISC-3<br>WRAT-3<br>MABC       |

|                                  |                                         |                     |                                                                                                                          |                                                                                                                                                                                                                                                                                                                            |                                                                                                                                                                                                                                                                                                              |                                                                        |                                 |
|----------------------------------|-----------------------------------------|---------------------|--------------------------------------------------------------------------------------------------------------------------|----------------------------------------------------------------------------------------------------------------------------------------------------------------------------------------------------------------------------------------------------------------------------------------------------------------------------|--------------------------------------------------------------------------------------------------------------------------------------------------------------------------------------------------------------------------------------------------------------------------------------------------------------|------------------------------------------------------------------------|---------------------------------|
| Leviton A et al, 2010, USA       | Early Hum Dev.                          | <28                 | To identify some of the antecedents of microcephaly at age 2years among children born before the 28th week of gestation. | <p><b>Strengths:</b> Multicentre, large numbers; high rates of follow up; considered social ethnic and perinatal factors</p> <p><b>Weaknesses:</b> Observational study</p>                                                                                                                                                 | <ul style="list-style-type: none"> <li>• Antenatal phenomena (low virulence organisms in placenta, tobacco exposure) and correlates of social class influence postnatal head growth.</li> <li>• Pre-eclampsia/fetal indications to deliver preterm associated with a greater risk of microcephaly</li> </ul> | CDC Data sets                                                          | BSITD-2 Motor Examination GMFCS |
| Kytarova J, 2011, Czech republic | Journal of Paediatrics and Child Health | 22-27 <sup>†b</sup> | To prospectively evaluate anthropometric parameters in children born as extremely premature neonates                     | <p><b>Strengths:</b> Examined extremely premature infants as a separate group</p> <p><b>Weaknesses:</b> Single centre, Head size not correlated with neurodevelopmental follow-up; Social and ethnic factors not considered</p>                                                                                            | <ul style="list-style-type: none"> <li>• OFC significantly lower in extreme prematurity ( &lt;26 weeks)</li> <li>• Decline in head growth between 2 and 5 years</li> </ul>                                                                                                                                   | Sixth anthropological survey of children in the Czech Republic in 2001 |                                 |
| Farooqi A, 2006, Sweden          | Pediatrics                              | <26                 | To examine growth development from birth to the age of 11 years                                                          | <p><b>Strengths:</b> Multicentre; use of a control population; considered social factors; excluded children with severe motor disability</p> <p><b>Weaknesses:</b> Neurosensory impairment identified by review of medical records; No data on OFC between 4 and 11 years; Insufficient data for analysis of birth OFC</p> | <ul style="list-style-type: none"> <li>• OFC of premature infants significantly lower than controls at all ages analysed</li> <li>• No catch-up OFC growth after 6 months</li> <li>• Birth weight z scores predicted head size</li> </ul>                                                                    | United Kingdom Growth Chart                                            |                                 |
| Horemuzova E et al, 2012, Sweden | Acta Paediatrica                        | <26                 | To provide growth charts for clinical monitoring of extra-uterine growth from birth to full-term age                     | <p><b>Strengths:</b> Large cohort of very preterm infants</p> <p><b>Weaknesses:</b> Single centre; no neurodevelopmental follow up</p>                                                                                                                                                                                     | <ul style="list-style-type: none"> <li>• OFC larger in boys at GA 23, 24 and 25 weeks</li> <li>• Head growth generally poor with a tendency to 'catch-up' before 40weeks CGA</li> <li>• Decreased gestational age and poor caloric intake indicators for poor overall growth</li> </ul>                      | Constructed growth charts from data collected                          |                                 |

|                                 |                                   |             |                                                                                                                                                                          |                                                                                                                                                                                                                                                         |                                                                                                                                                                                                                                                                                                                         |                                                 |                                                        |
|---------------------------------|-----------------------------------|-------------|--------------------------------------------------------------------------------------------------------------------------------------------------------------------------|---------------------------------------------------------------------------------------------------------------------------------------------------------------------------------------------------------------------------------------------------------|-------------------------------------------------------------------------------------------------------------------------------------------------------------------------------------------------------------------------------------------------------------------------------------------------------------------------|-------------------------------------------------|--------------------------------------------------------|
| Costeloe K et al, 2012, UK      | British Medical Journal           | <26         | To examine survival and developmental outcomes in cohort of infants born at <26 weeks in UK                                                                              | <p><b>Strengths:</b> Large cohort; multicentre</p> <p><b>Weaknesses:</b> Only comment on change in OFC z score from birth to EDD</p>                                                                                                                    | <ul style="list-style-type: none"> <li>No improvement in OFC growth from birth to EDD seen in 2006 compared with 1995</li> </ul>                                                                                                                                                                                        |                                                 |                                                        |
| Dammann et al, 2010, USA        | Neonatology                       | <28         | To assess how illness severity measures predict death and illnesses in the newborn.                                                                                      | <p><b>Strengths:</b> Multicentre; large cohort; social factors considered.</p> <p><b>Weaknesses:</b> Present developmental outcomes in relation to SNAP-II and SNAPPE-II scores but not in relation to head size.</p>                                   | <ul style="list-style-type: none"> <li>High SNAP-II and SNAPPE-II scores predicted infants with OFC &gt;2 SD below expected mean at 24 months.</li> </ul>                                                                                                                                                               | CDA datasets                                    | Neurological examination@24 months<br>BSITD-2<br>GMFCS |
| Leviton et al, 2011, USA        | Early Human Development           | 23-28weeks  | To evaluate if concentrations of inflammation-related proteins were elevated in early postnatal blood specimens of preterm newborns who two years later had a small head | <p><b>Strengths:</b> Multicentre, large cohort</p> <p><b>Weaknesses:</b> Neuroimaging and developmental follow up not included</p>                                                                                                                      | <ul style="list-style-type: none"> <li>Microcephaly and small head associated with low gestational age and birth weight.</li> <li>Elevated concentrations of inflammation related proteins associated with microcephaly and/or small head size at 2 years.</li> </ul>                                                   | CDC datasets                                    |                                                        |
| Ahmad I et al, 2010, USA        | American Journal of Human Biology | 23-42 weeks | To compare multimodal measurements of body composition                                                                                                                   | <p><b>Strengths:</b> Stratified according to gestational age</p> <p><b>Weaknesses:</b> Small sample size; only data on birth OFC presented; Absolute OFC measurement presented rather than OFC percentile for gestational age</p>                       | <ul style="list-style-type: none"> <li>Mean birth OFC (cms) 30.7 95%CI (29.8,31.5)</li> </ul>                                                                                                                                                                                                                           |                                                 |                                                        |
| Diekmann M et al, 2005, Germany | European Journal of Paediatrics   | 23-28 weeks | To investigate which postnatal growth pattern is ideal for extremely low birth weight infants                                                                            | <p><b>Strengths:</b> Stratified by birthweight ; SGA babies analysed separately; intrauterine growth curves</p> <p><b>Weaknesses:</b> Inclusion determined by birthweight rather than gestational age; data collected by retrospective chart review</p> | <ul style="list-style-type: none"> <li>No significant difference found for weekly OFC growth velocity for SGA in comparison to AGA infants</li> <li>Postnatal median growth was &gt; 10<sup>th</sup> percentile of intrauterine reference curves falling below the 10<sup>th</sup> percentile after 33 weeks</li> </ul> | Intrauterine growth curves - Voigt et al (1996) |                                                        |

Table S1b Studies Including Infants 28-32 Completed Weeks Gestation

| Author/Year/<br>Country       | Journal                           | Gestational<br>Age<br>Range<br>(weeks) | Primary Endpoint                                                                                                                                                                                   | Strengths/ Weaknesses                                                                                                                                                                 | Findings pertaining to Head Size                                                                                                                                                                                                                                                                                        | Head Size<br>Reference                           | Neurodevelopmental<br>Assessments |
|-------------------------------|-----------------------------------|----------------------------------------|----------------------------------------------------------------------------------------------------------------------------------------------------------------------------------------------------|---------------------------------------------------------------------------------------------------------------------------------------------------------------------------------------|-------------------------------------------------------------------------------------------------------------------------------------------------------------------------------------------------------------------------------------------------------------------------------------------------------------------------|--------------------------------------------------|-----------------------------------|
| Neubauer et al, 2013, Austria | ActaPaediatrica                   | 24 -32                                 | To examine the association between neurodevelopmental outcome and head circumference in a cohort of very preterm infants and in this context to investigate the relevance of suboptimal head size. | <b>Strengths:</b> Prospective, adjusted for social and perinatal factors<br><b>Weaknesses:</b> Extremely premature infants not analysed as a separate group; Ethnicity not considered | <ul style="list-style-type: none"> <li>OFC catch-up growth seen between discharge and 3 months</li> <li>Suboptimal head size at birth did not predict outcome at any age</li> <li>At 3 months suboptimal head size was a strong predictor for both cognitive and psychomotor development at 12 and 24 months</li> </ul> | Growth charts developed by Pan et al.            | BSITD 2 @ 12 and 24 months CGA    |
| Cooke R. W. 2005, UK          | Arch Dis Child Fetal Neonatal Ed. | <32                                    | To examine associations between cognitive and minor motor problems in preterm children and perinatal and postnatal clinical factors.                                                               | <b>Strengths:</b> Multicentre; neurodevelopmental follow-up at 7 years<br><b>Weaknesses:</b> 102(27%) Children lost to follow up                                                      | <ul style="list-style-type: none"> <li>OFC at 7 years independently significantly related to IQ.</li> <li>OFC at 7 years associated with parenchymal brain lesions on neonatal ultrasound.</li> </ul>                                                                                                                   | "4 in 1" growth charts (Growth Foundation)       | WISC 3 MABC                       |
| Tan M et al, 2008, UK         | Arch Dis Child Fetal Neonatal Ed. | <29                                    | To examine the feasibility of providing macronutrients at amounts above current recommendations (hyperalimentation) to improve nutrition and head growth in preterm infants.                       | <b>Strengths:</b> Randomized controlled trial<br><b>Weaknesses:</b> Single centre; unblinded; small sample size                                                                       | <ul style="list-style-type: none"> <li>Factors significantly associated with OFC&gt; 2 SD below mean at 36 weeks CGA were days to full feeds; CRIB 2 score; SD score of first recorded OFC; cumulative protein and energy deficits</li> </ul>                                                                           | Gairdner Pearson growth reference                |                                   |
| Franz AR, 2009, Germany       | Pediatrics                        | <30                                    | To determine whether intrauterine, early neonatal, or postdischarge growth is associated                                                                                                           | <b>Strengths:</b> Neurodevelopmental follow-up to 5.4 years; perinatal and social factors considered in analyses<br><b>Weaknesses:</b> Single centre;                                 | <ul style="list-style-type: none"> <li>The median SD score for OFC decreases from birth to discharge and further decreases at follow up</li> <li>OFC growth from birth to discharge is an important</li> </ul>                                                                                                          | Microsoft Excel add-in LMSgrowth (version 2.14;) | Neurological Examination KABC     |

|                                   |                                                     |         |                                                                                                                                                                                                                      |                                                                                                                                                                                                                                                                                                                                                                                                                                            |                                                                                                                                                                                                                                                                                             |                                          |                                                                 |
|-----------------------------------|-----------------------------------------------------|---------|----------------------------------------------------------------------------------------------------------------------------------------------------------------------------------------------------------------------|--------------------------------------------------------------------------------------------------------------------------------------------------------------------------------------------------------------------------------------------------------------------------------------------------------------------------------------------------------------------------------------------------------------------------------------------|---------------------------------------------------------------------------------------------------------------------------------------------------------------------------------------------------------------------------------------------------------------------------------------------|------------------------------------------|-----------------------------------------------------------------|
|                                   |                                                     |         | with neurocognitive and motor-developmental outcome in extremely preterm infants.                                                                                                                                    | lack of data on nutritional intake                                                                                                                                                                                                                                                                                                                                                                                                         | predictor of neurologic and gross motor development at 5.4 years                                                                                                                                                                                                                            |                                          |                                                                 |
| Maguire, 2008, Netherlands        | Pediatrics                                          | <32     | To investigate the effect of basic elements of developmental care on days of respiratory support and intensive care, growth, and neuromotor development at term age in infants who were born at <32 weeks' gestation | <b>Strengths:</b> Multicentre; social and ethnic factors considered<br><b>Weaknesses:</b> High attrition rates from recruitment to follow up; unblinded                                                                                                                                                                                                                                                                                    | <ul style="list-style-type: none"> <li>Developmental care interventions had no significant effect on OFC</li> </ul>                                                                                                                                                                         |                                          | Neurological Examination                                        |
| Biasini A et al, 2012, Italy      | The Journal of Maternal-Fetal and Neonatal Medicine | 23-32   | To investigate growth and neurological outcome in preterm infants fed with human milk and extra-protein supplementation as routine practice.                                                                         | <b>Weaknesses:</b> Single centre; Small sample size; significant differences in basic characteristics between groups; neurodevelopmental follow-up only to 9 months.                                                                                                                                                                                                                                                                       | <ul style="list-style-type: none"> <li>Up to 9 months CGA extra protein group showed better OFC catch up growth.</li> <li>GDMS did not show any significant difference between groups at 9 months CGA.</li> </ul>                                                                           |                                          | GDMS<br>MilaniComparetti and AmielTison neurological assessment |
| Zachariassen et al, 2011, Denmark | Pediatrics                                          | 23 – 32 | To determine if the addition of a multinutrient human milk fortifier to mother's milk while breastfeeding very preterm infants after hospital discharge is possible and whether it influences first-year growth      | <b>Strengths:</b> Multicentre; prospective randomized controlled trial; social factors considered<br><b>Weaknesses:</b> 25% of neonates excluded (those with severe diseases or circumstances influencing feeding ability at discharge); 25% non consent rate; Characteristics of study group significantly different to non consent group; unblinded ; per protocol analysis performed because of many changes in nutrition in all groups | <ul style="list-style-type: none"> <li>Boys showed higher OFC score within all 3 groups from term until 12 months</li> <li>Mean OFC z score nadir at 3 months CGA</li> <li>OFC from term to 4 months significantly higher in girls breastfeeding combined with EBM fortification</li> </ul> | Niklasson et al Swedish growth reference |                                                                 |

|                                |                                   |             |                                                                                                                                                                                                                                                           |                                                                                                                                                                                                                                                                                                                   |                                                                                                                                                                                                                                                                                                                                                                                                             |                                   |        |
|--------------------------------|-----------------------------------|-------------|-----------------------------------------------------------------------------------------------------------------------------------------------------------------------------------------------------------------------------------------------------------|-------------------------------------------------------------------------------------------------------------------------------------------------------------------------------------------------------------------------------------------------------------------------------------------------------------------|-------------------------------------------------------------------------------------------------------------------------------------------------------------------------------------------------------------------------------------------------------------------------------------------------------------------------------------------------------------------------------------------------------------|-----------------------------------|--------|
| Itabashi K et al, 2007, Japan  | Early Hum Dev                     | 24.0 – 31.9 | This aims to conduct a comparative study of the height catch-up rate in preterm small for gestational age (SGA) infants during early childhood by gestational age and identify the factors affecting short stature in comparison to full-term SGA infants | <p><b>Strengths:</b> Multicentre; 32-37 week and term groups included; maternal OFC considered in &gt;32 week infants;</p> <p><b>Weaknesses:</b> Results applicable only to Japanese population; small sample size of very preterm infants; missing data limited study to longitudinal assessment at 5 years</p>  | <ul style="list-style-type: none"> <li>In infants born &gt;32 weeks head circumference at birth is a significant factor affecting height catch-up at 5 years</li> </ul>                                                                                                                                                                                                                                     |                                   |        |
| Tan M et al, 2008, UK          | Arch Dis Child Fetal Neonatal Ed. | < 29 weeks  | To explore the relationships between early nutrition, post-natal head growth, quantitative magnetic resonance imaging and developmental outcome in the first year                                                                                         | <p><b>Strengths:</b> MR data included</p> <p><b>Weaknesses:</b> 32% of recruited infants were excluded or did not have parental consent ; 1.5 Tesla MR scanner; Quality of scans inadequate for brain volume measurements in up to 25%; BSITD assessor not blinded; developmental outcome not primary outcome</p> | <ul style="list-style-type: none"> <li>Good correlation between OFC measurement and total brain volume</li> <li>No significant differences in OFC and BSITD scores in infants randomised to receive hyperalimantation or standard feeding</li> <li>Pooled data showed that energy deficit in the first 28 days correlates significantly with total brain volume and BSITD scores at 3 months CGA</li> </ul> | Gairdner Pearson growth reference | BSITD2 |
| Cockerill J et al, 2006, UK    | Arch Dis Child Fetal Neonatal Ed. | ≤32 weeks   | To evaluate weight gain and head growth between birth and term in a contemporary cohort of preterm infants, taking into account breast milk intake and illness severity.                                                                                  | <p><b>Strengths:</b> Controlled for social factors</p> <p><b>Weaknesses:</b> Single centre; small sample size; infants remaining in unit at ≥37 weeks not representative of entire population</p>                                                                                                                 | <ul style="list-style-type: none"> <li>Highly significant correlation between weight standard deviation score gain (SDSG) and OFC SDSG</li> <li>Accelerated postnatal head growth which was enhanced by breast milk</li> </ul>                                                                                                                                                                              | 1990 British Growth Reference     |        |
| Löfqvist C et al, 2006, Sweden | Pediatrics                        | <32 weeks   | To investigate whether retinal vascular growth retardation is paralleled by brain growth retardation                                                                                                                                                      | <p><b>Strengths:</b> Multicentre; adjusted for other neonatal morbidities</p> <p><b>Weaknesses:</b> Small sample size</p>                                                                                                                                                                                         | <ul style="list-style-type: none"> <li>Degree of head growth restriction postnatally corresponded to degree of ROP</li> <li>Serum IGF-1 levels from birth to 31 weeks CGA correlate with OFC</li> <li>Decline in head growth shown to precede occurrence of</li> </ul>                                                                                                                                      | Swedish reference standard        |        |

|                                 |                                        |               |                                                                                                                                                                                              |                                                                                                                                                              |                                                                                                                                                                                                                                                                             |                                                                                                                 |  |
|---------------------------------|----------------------------------------|---------------|----------------------------------------------------------------------------------------------------------------------------------------------------------------------------------------------|--------------------------------------------------------------------------------------------------------------------------------------------------------------|-----------------------------------------------------------------------------------------------------------------------------------------------------------------------------------------------------------------------------------------------------------------------------|-----------------------------------------------------------------------------------------------------------------|--|
|                                 |                                        |               | in premature infants                                                                                                                                                                         |                                                                                                                                                              | proliferative ROP                                                                                                                                                                                                                                                           |                                                                                                                 |  |
| Sakurai M et al, 2008, Japan    | Pediatrics international               | 23 – 32 weeks | To determine the frequency and contributing factors of EUGR in infants ≥32 weeks of gestational age.                                                                                         | <b>Strengths:</b> Multicentre ; stepwise logistic regression analysis of many neonatal factors<br><b>Weaknesses:</b> Cross sectional design                  | <ul style="list-style-type: none"> <li>• Lower gestational age strongly influences extrauterine head growth.</li> <li>• Even at low gestational ages significant brain sparing effects seen.</li> </ul>                                                                     |                                                                                                                 |  |
| Miller J et al, 2012, Australia | American Journal of Clinical Nutrition | <31 weeks     | To assess the effect of human milk fortified with a higher-protein HMF on growth in preterm infants                                                                                          | <b>Strengths:</b> Randomised controlled study<br><b>Weaknesses:</b> Single centre; small sample size; OFC not a primary outcome measure                      | <ul style="list-style-type: none"> <li>• No significant differences in head growth between babies randomised to higher protein or control fortifier.</li> </ul>                                                                                                             | New South Wales birthweight percentile charts                                                                   |  |
| Herrmann KR et al, 2010, USA    | Nutrition in Clinical practice         | <32 weeks     | To test the hypothesis that premature infants would grow adequately when they received more than 50 kcal/kg per day of parenteral nutrition                                                  | <b>Strengths:</b> Infants stratified by birthweight; use of intrauterine percentiles<br><b>Weaknesses:</b> Single centre; small sample size                  | <ul style="list-style-type: none"> <li>• OFC remained &gt; 10<sup>TH</sup> percentile for intrauterine growth for all except 24 week GA cohort.</li> <li>• Study participants' ( early parenteral nutrition) OFC was 1 SD &gt; mean OFC in the comparison group.</li> </ul> | Babson and Benda intrauterine growth data                                                                       |  |
| Karna P, 2005, USA              | Paediatric and Perinatal Epidemiology  | 23 – 29 weeks | To provide new national reference values for extremely preterm neonates.                                                                                                                     | <b>Strengths:</b> Multicentre; large sample size; ethnicity considered<br><b>Weaknesses:</b> Large number (28%) excluded due to missing maternal information | <ul style="list-style-type: none"> <li>• Average increase in OFC was 0.99cms per week of gestation</li> <li>• OFC larger for boys and twins and did not differ by race</li> </ul>                                                                                           | Multiple growth charts used : Lubchenco growth charts Usher and McLean growth charts Thomas et al growth charts |  |
| Maas C et al, 2013, Germany     | Neonatology                            | <32 weeks     | To evaluate the effects of accelerated enteral feeding advancement on the time to full enteral feeds, on early postnatal growth as well as on the frequency of necrotizing enterocolitis and | <b>Strengths:</b> >50% cohorts <28weeks gestational age<br><b>Weakness:</b> Single centre; small sample size; observational design                           | <ul style="list-style-type: none"> <li>• No benefit observed in OFC growth with more rapid feeding and higher protein and energy in the first 3 weeks of life</li> </ul>                                                                                                    | LMS growth                                                                                                      |  |

|                                       |                   |               |                                                                                                                                                                            |                                                                                                                                                                                                                                                                                            |                                                                                                                                                                                                                                                                                                                                                                                            |                                                     |                                                                                |
|---------------------------------------|-------------------|---------------|----------------------------------------------------------------------------------------------------------------------------------------------------------------------------|--------------------------------------------------------------------------------------------------------------------------------------------------------------------------------------------------------------------------------------------------------------------------------------------|--------------------------------------------------------------------------------------------------------------------------------------------------------------------------------------------------------------------------------------------------------------------------------------------------------------------------------------------------------------------------------------------|-----------------------------------------------------|--------------------------------------------------------------------------------|
|                                       |                   |               | focal intestinal perforation in very premature infants                                                                                                                     |                                                                                                                                                                                                                                                                                            |                                                                                                                                                                                                                                                                                                                                                                                            |                                                     |                                                                                |
| Cheong et al, 2008, Australia         | Pediatrics        | <30 weeks     | To establish the relationship between head circumference with brain MRI at term-equivalent age and to relate head circumference with neurodevelopmental outcome at 2 years | <p><b>Strengths:</b> Social factors considered; MR scans scored blindly by 2 independent raters; high follow up rate for neurodevelopmental assessments (94%)</p> <p><b>Weaknesses:</b> Quantitative volumetric MR analysis not possible in 13%; Birth OFC only available in 130 (57%)</p> | <ul style="list-style-type: none"> <li>• Microcephaly increased from 7.5% at term to 29.7% at 2 years</li> <li>• No significant relationship between OFC and white/grey matter abnormalities on MRI.</li> <li>• Strong correlation found between OFC and brain volume at birth</li> <li>• At 2 years CGA microcephaly associated with poor development and increased rate of CP</li> </ul> | British Growth Reference Data                       | BSITD 2 Standardized Neurological Examination Assessment of Vision and Hearing |
| Van der Lugt et al, 2010, Netherlands | BMC Pediatrics    | 24 – 32 weeks | To investigate the effects of neonatal hyperglycemia on growth and neurobehavioral outcome at 2 years of age                                                               | <p><b>Strengths:</b> Large sample size; adjusted for potential confounders; subgroup analyses by gestational age and birth weight</p> <p><b>Weaknesses:</b> Single centre; retrospective design can only outline association ; multiple potential confounding factors</p>                  | <ul style="list-style-type: none"> <li>• OFC at 2 years not different in infants exposed to hyperglycaemia compared to unexposed neonates</li> </ul>                                                                                                                                                                                                                                       |                                                     | Neurological Examination ( Hempel 1993) CBCL/2-3                               |
| Vinall et al, 2013, Canada            | Sci. Transl. Med. | 24 – 32 weeks | To examine the association between neonatal growth and diffusion tensor imaging measures of microstructural cortical development in infants born very preterm              | <p><b>Strengths:</b> Analyses considered many medical confounders;</p> <p><b>Weaknesses:</b> Single centre; small sample size within each category of injury; &lt;27 weeks not analyzed as a separate group; 1.5 Telsa MR</p>                                                              | <ul style="list-style-type: none"> <li>• Impaired head growth between 32 and 40 weeks associated with delayed microstructural development of the cortical grey matter, independent of birth weight, brain injury and systemic illness.</li> </ul>                                                                                                                                          |                                                     |                                                                                |
| Vinall et al, 2012, Canada            | Pain              | < 32 weeks    | To examine whether neonatal pain is related to postnatal body and head growth in infants born very preterm                                                                 | <p><b>Strengths:</b> Identified and controlled for key indicators of potential medical confounders</p> <p><b>Weaknesses:</b> Single centre; small sample size</p>                                                                                                                          | <ul style="list-style-type: none"> <li>• Lower birth OFC, more neonatal pain and longer duration of mechanical ventilation independently associated with decreased OFC percentile at 32 weeks CGA</li> <li>• Lower birth OFC, longer duration of mechanical ventilation and hydrocortisone exposure rather than pain independently</li> </ul>                                              | Sex specific British Columbia population based data |                                                                                |



|                                   |                   |            |                                                                                                                                                                       |                                                                                                                                                                                                               |                                                                                                                                                                                                                                                                                     |                                                                                                                                           |                                                                        |
|-----------------------------------|-------------------|------------|-----------------------------------------------------------------------------------------------------------------------------------------------------------------------|---------------------------------------------------------------------------------------------------------------------------------------------------------------------------------------------------------------|-------------------------------------------------------------------------------------------------------------------------------------------------------------------------------------------------------------------------------------------------------------------------------------|-------------------------------------------------------------------------------------------------------------------------------------------|------------------------------------------------------------------------|
|                                   |                   |            |                                                                                                                                                                       |                                                                                                                                                                                                               | <p>associated with decreased OFC percentile at 40 weeks CGA</p> <ul style="list-style-type: none"> <li>Accelerated head growth relative to body growth seen after 32 weeks CGA.</li> </ul>                                                                                          |                                                                                                                                           |                                                                        |
| Euser et al, 2011, Netherlands    | Horm Res Paediatr | < 32 weeks | To test the effect of the IGF1 192-bp allele on cranial and linear growth and body mass index from birth until age 5 years, and on IQ and serum IGF-1 at age 19 years | <p><b>Strengths:</b> Multicentre; adjusted for birth weight and socioeconomic status</p> <p><b>Weaknesses:</b> Study cohort born in 1983; Sample studied not representative of general preterm population</p> | <ul style="list-style-type: none"> <li>Homozygosity for the IGF1 promoter 192-bp allele associated with a slower cranial growth from birth until 5 years but not IQ at 19 years of age.</li> <li>OFC at 5 years positively associated with IQ at age 19</li> </ul>                  | <p>Birth: Swedish References for Preterm Infants( Niklasson et al 1991)</p> <p>Follow up: Dutch reference values(Fredriks et al 2000)</p> |                                                                        |
| Rijken M et al, 2007, Netherlands | Early Hum Dev.    | 23.7-31.9  | To assess the relationship between growth, perinatal factors and neurodevelopmental outcome.                                                                          | <p><b>Strengths:</b>Multicentre;Controlled for ethnicity and perinatal variables</p> <p><b>Weaknesses:</b> Limited number of infants with microcephaly</p>                                                    | <ul style="list-style-type: none"> <li>Smaller OFC associated with mental and psychomotor delay and abnormal neurological exam</li> <li>Catch up head growth poorer in SGA infants</li> <li>Postnatal use of dexamethasone negatively associated with head circumference</li> </ul> | Dutch growth charts                                                                                                                       | <p>Neurological examination @ term; 12 and 24 months</p> <p>BSITD1</p> |
